# Supplementary material for: A label-free and selective SERS-based sensor for determination of ampicillin contamination in water using a fabric gold–silver alloy substrate with a handheld Raman spectrometer
Source: Royal Society of Chemistry journal article supplement (doi:10.1039/d2nj05346b), 2023-01-01
Supplement: d2nj05346b1.pdf [file d2nj05346b1.pdf]

## Supporting Information

### **Label-free and selective SERS-based sensor for determination of ampicillin contamination in water using Fabric Gold-Silver alloy substrate with handheld Raman spectrometer**

Kullavadee Karn-orachai\*, Aroonsri Ngamaroonchote

National Nanotechnology Center (NANOTEC), National Science and Technology Development Agency (NSTDA), Pathum Thani 12120, Thailand

E-mail: [kullavadee.kar@nanotec.or.th](mailto:kullavadee.kar@nanotec.or.th)

Bare maslin fabric

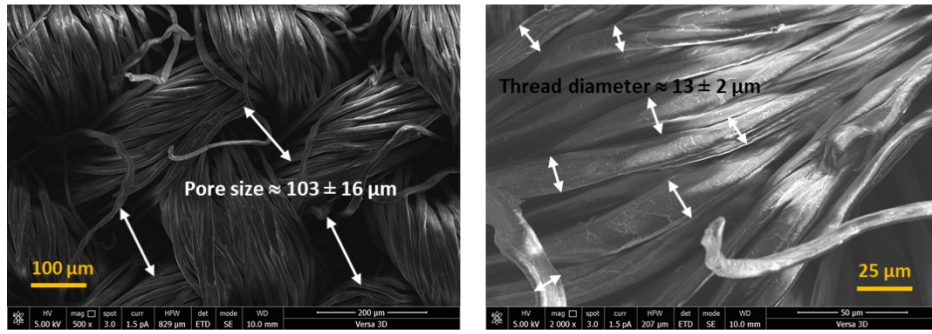

Fig. S1 SEM images of bare Maslin fabric.

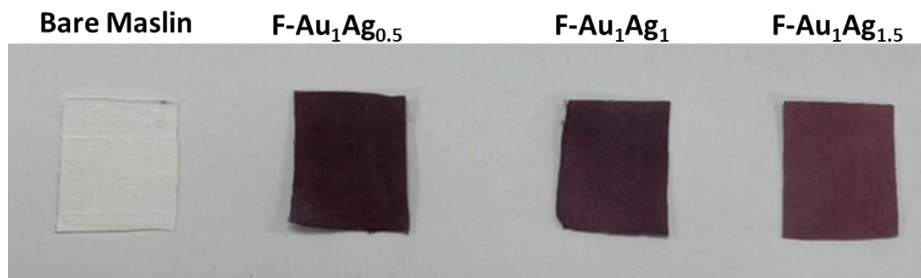

Fig. S2 The photos of bare maslin fabric and plasmonic textiles at three different ratios of Au and Ag.

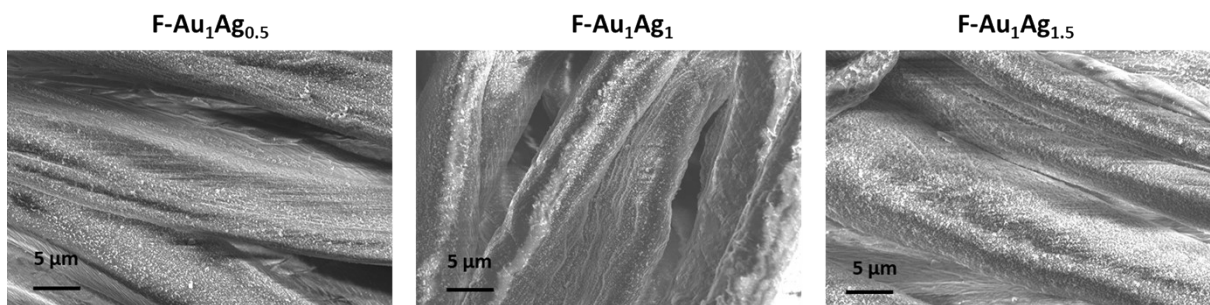

Fig. S3 SEM images with low magnification of Au-Ag alloy NPs deposited on Maslin fabric.

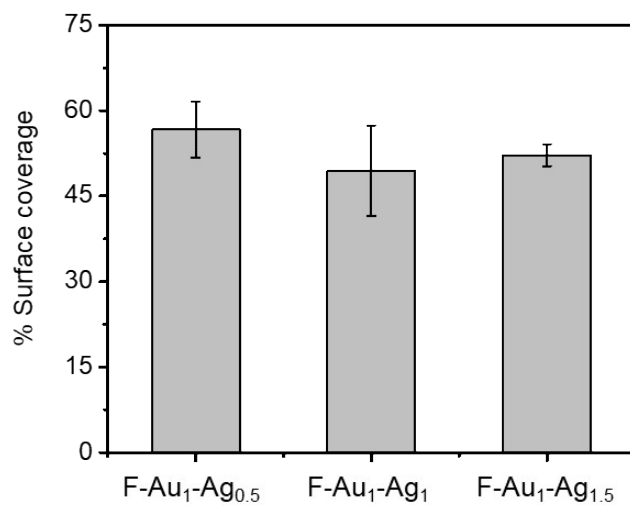

**Fig. S4** Bar graph of surface coverage of Au-Ag NPs on each plasmonic fabric.

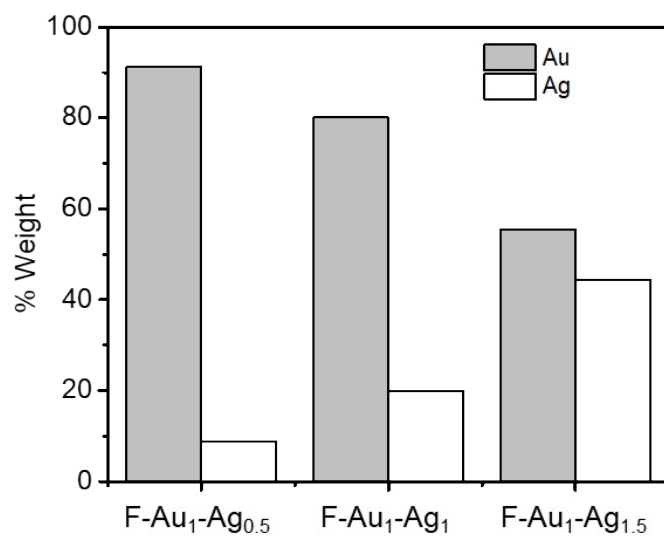

**Fig. S5** Percentage of Au and Ag contents in Au-Ag alloy NPs from three different Au-Ag molar ratios coated plasmonic fabrics.

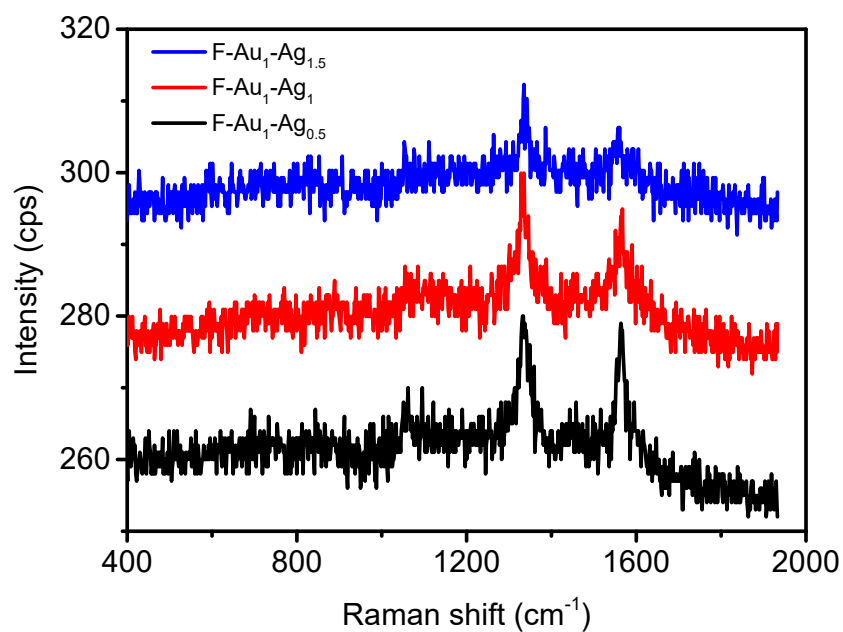

**Fig. S6** SERS spectra of DSNB coated plasmonic substrates with three different Au and Ag molar ratios extracted from 2D Raman mapping image.

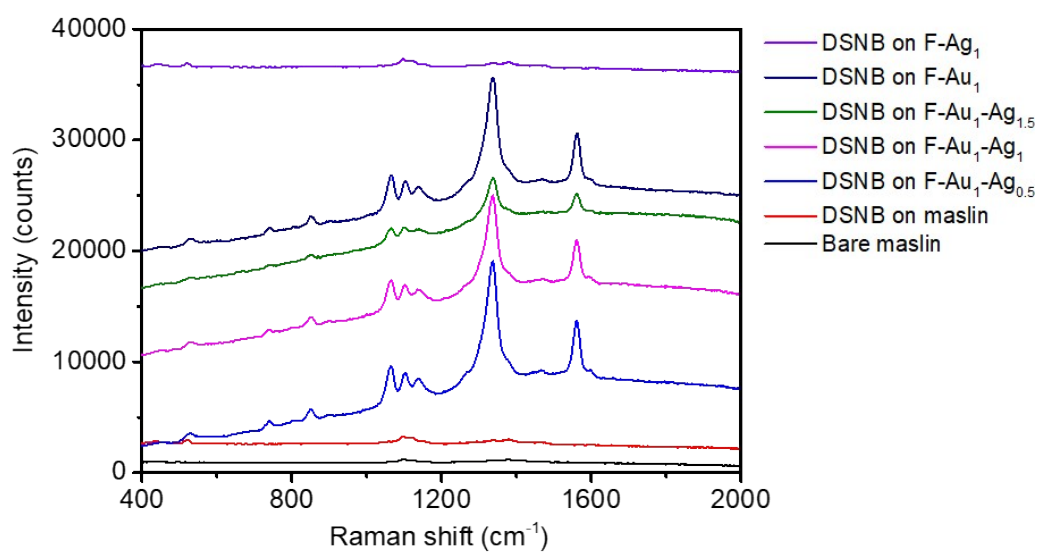

**Fig. S7** SERS spectra of bare maslin fabric, 1 μM DSNB on maslin textile and all plasmonic fabric substrates.

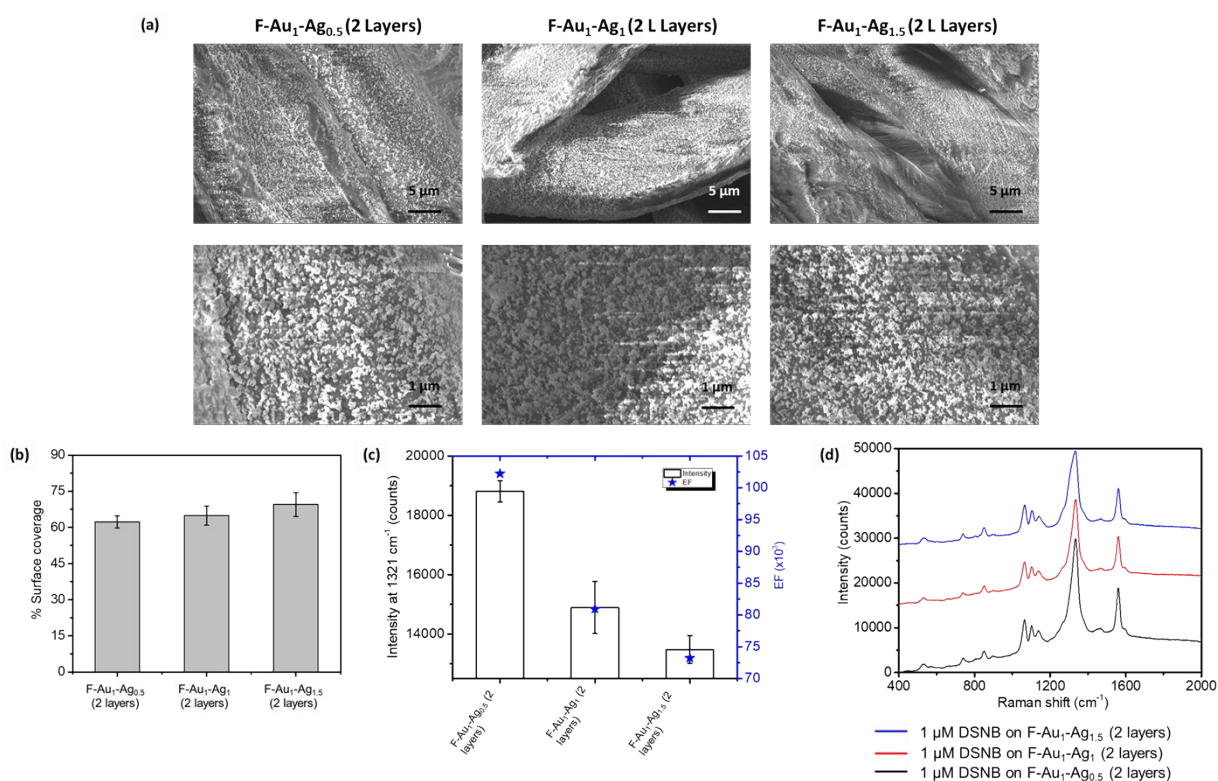

**Fig. S8** (a) SEM images with low (upper), and high (lower) magnifications and (b) surface coverage of two-layer deposition of all plasmonic fabrics with three different Au-Ag molar ratios. (c) double y-axes: DSNB signal (on the left) and enhancement factor (on the right) versus two-layer deposition of plasmonic fabrics with different Au-Ag molar ratios. (d) SERS spectra of 1 μM DSNB on all plasmonic fabric substrates with two cycles deposition.

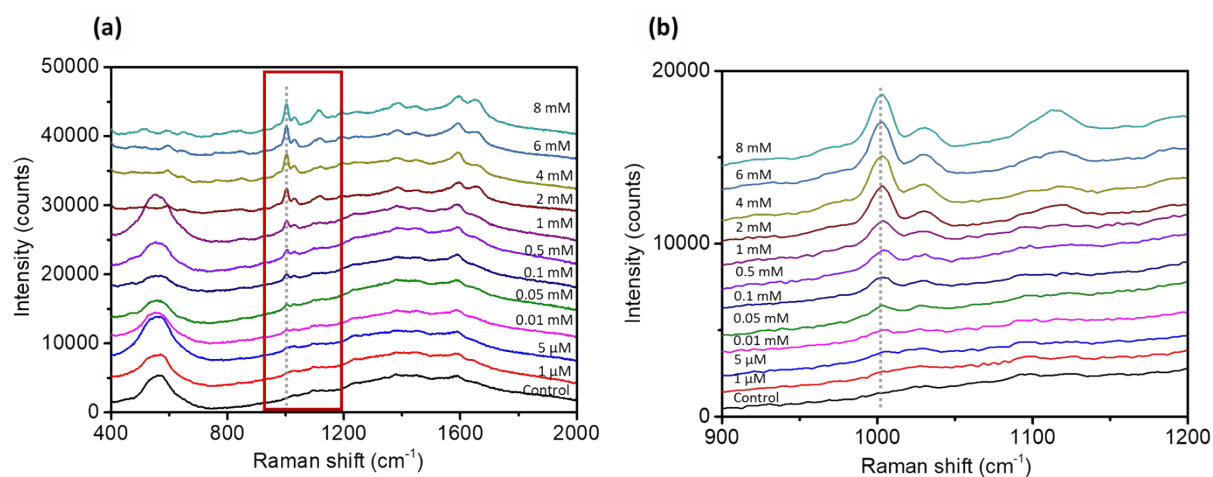

**Fig. S9** (a) SERS spectra of Ampicillin performed on F-Au<sub>1</sub>-Ag<sub>0.5</sub> substrate. (b) A zoom on the 900 – 1200 cm<sup>-1</sup> region of ampicillin spectra. The dotted line at 1004 cm<sup>-1</sup> shows the characteristic peak of all concentration of ampicillin on plasmonic fabrics.

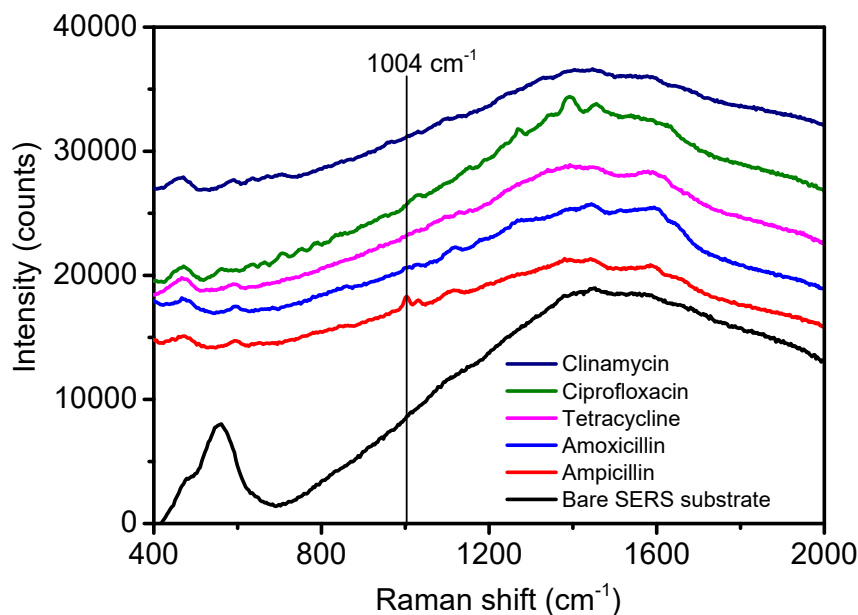

**Fig. S10** SERS spectra of all antibiotics at the fixed concentration of 1 mM performed on F-Au<sub>1</sub>-Ag<sub>0.5</sub> substrate.

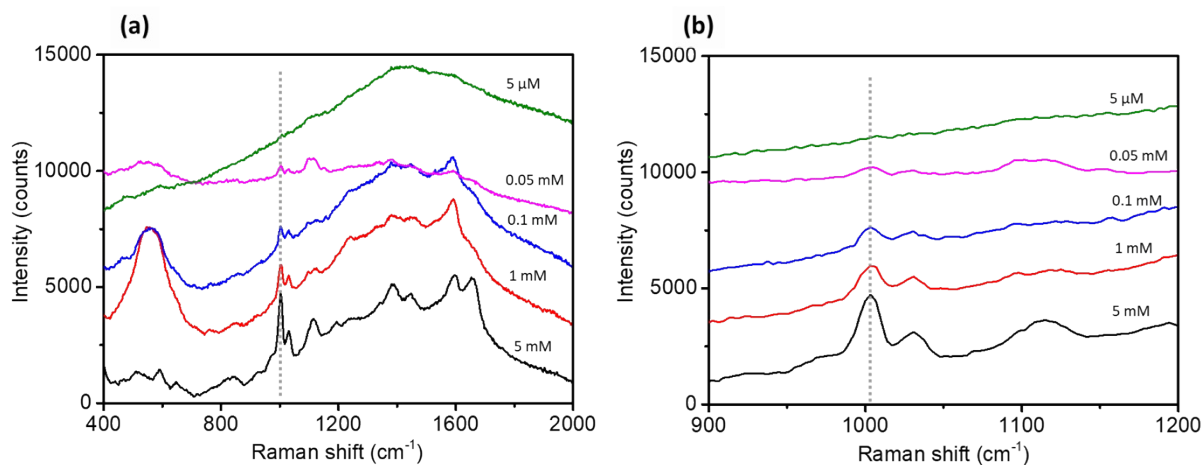

**Fig. S11** (a) SERS spectra of ampicillin spiked in raw natural water (5 mM to 5  $\mu$ M) performed on F-Au<sub>1</sub>-Ag<sub>0.5</sub> substrate. (b) A zoom on the 900 – 1200  $\text{cm}^{-1}$  region of ampicillin spectra. The dotted line at 1004  $\text{cm}^{-1}$  shows the characteristic peak of all concentration of ampicillin on plasmonic fabrics.

**Table S1** Comparison of EF calculation from various SERS substrate based on metal NPs coated fabric textiles.

| SERS substrate                                        | EF                                                   | Shape  | Raman spectrometer                                                       | Reference |
|-------------------------------------------------------|------------------------------------------------------|--------|--------------------------------------------------------------------------|-----------|
| Au-Ag alloy nanoparticles on filter paper (immersing) | EF = $4.43 \times 10^4$ for crystal violet detection | Sphere | Andor SR750 spectrometer with a 532 nm Verdi V-6 laser excitation source | 1         |

|                                                              |                                                                                          |        |                                                                                                            |             |
|--------------------------------------------------------------|------------------------------------------------------------------------------------------|--------|------------------------------------------------------------------------------------------------------------|-------------|
| AuNPs coated paper substrate (immersing)                     | EF = $7.8 \times 10^8$ for 2-naphthalenethiol detection                                  | Sphere | SENTERRA confocal Raman system (Bruker Optics, Billerica, MA) by focusing a 785 nm diode laser             | 2           |
| AgNPs coated cotton fabric (sputtering)                      | EF = $10^4$ for 1 mM methylene blue detection                                            | Sphere | Nomadic <sup>TM</sup> Raman 3-in-1 microscope with excitation lasers of 532 nm and 785 nm                  | 3           |
| PDA@AgNPs on non-woven fabrics                               | EF = $7.02 \times 10^6$ for crystal violet detection                                     | Sphere | Raman analyses were performed on a inVia9 Raman Microscope using a 532 nm laser irradiation (Renishaw, UK) | 4           |
| Au <sub>1</sub> -Ag <sub>0.5</sub> NPs coated maslin fabrics | EF = $5.2 \times 10^4$ for 5,5'-dithiobis (succinimidyl-2-nitrobenzoate (DSNB) detection | Sphere | handheld Raman spectrometer (Mira M-3, Metrohm)                                                            | (our study) |

#### References

1. G. A. Khan, O. O. Demirtas, A. Bek, A. S. Bhatti, W. Ahmed, *Vib. Spectrosc.*, 2022, **120**, 103359.
2. W. Kim, J.-C. Lee, J.-H. Shin, K.-H. Jin, H.-K. Park and S. Choi, *Anal. Chem.*, 2016, **88**, 5531-5537.
3. X. Bian, J. Xu, Y. Pu, J. Yang, K.-L. Chiu and S. Jiang, *J. Ind. Text.*, 2021, **51**, 712S-727S.
4. Z. Zhang, T. Si, J. Liu and G. Zhou, *Nanomaterials (Basel)*, 2019, **9**, 384
